# Supplementary material
Source: publisher figshare collection journal article supplement (https://frontiersin.figshare.com/ndownloader/files/13248107)

# Trace plots

## Trace plots

Here, we report trace plots of parameter values by each model and dependent variable. Each graph shows transitions of parameter values by iterations of the MCMC simulation. The transitions were shown by each of four MCMC chains. Horizontal and vertical axis represent iterations and parameter values, respectively. Labels in the top of each graph indicate each parameter. Burn-in steps (i.e., first 1,000 iterations, which were discarded when estimating posterior distributions of each parameter) were shaded in gray.

## Results of each model when government effectiveness was used as an independent variable

### Model 1

Labels in the top of each graph represent types of parameter:  $a_0 = a_0$ ,  $GE = GE$ ,  $PS = PS$ , and  $\sigma_y = \sigma_y$ .

### Individualism

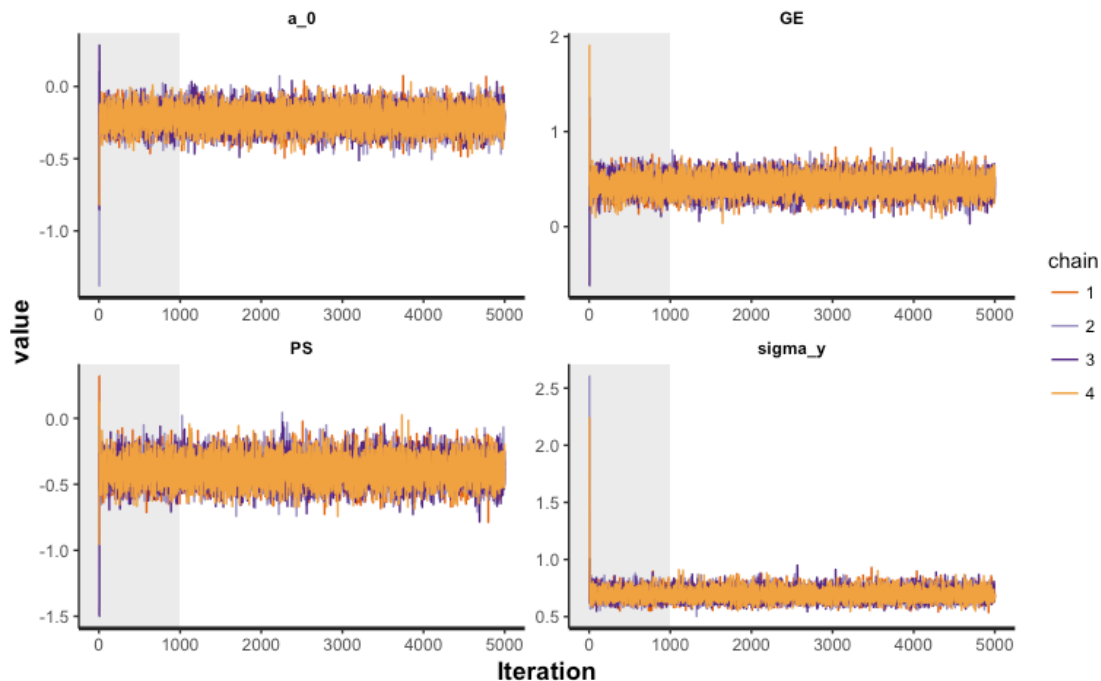

## Conformity 1

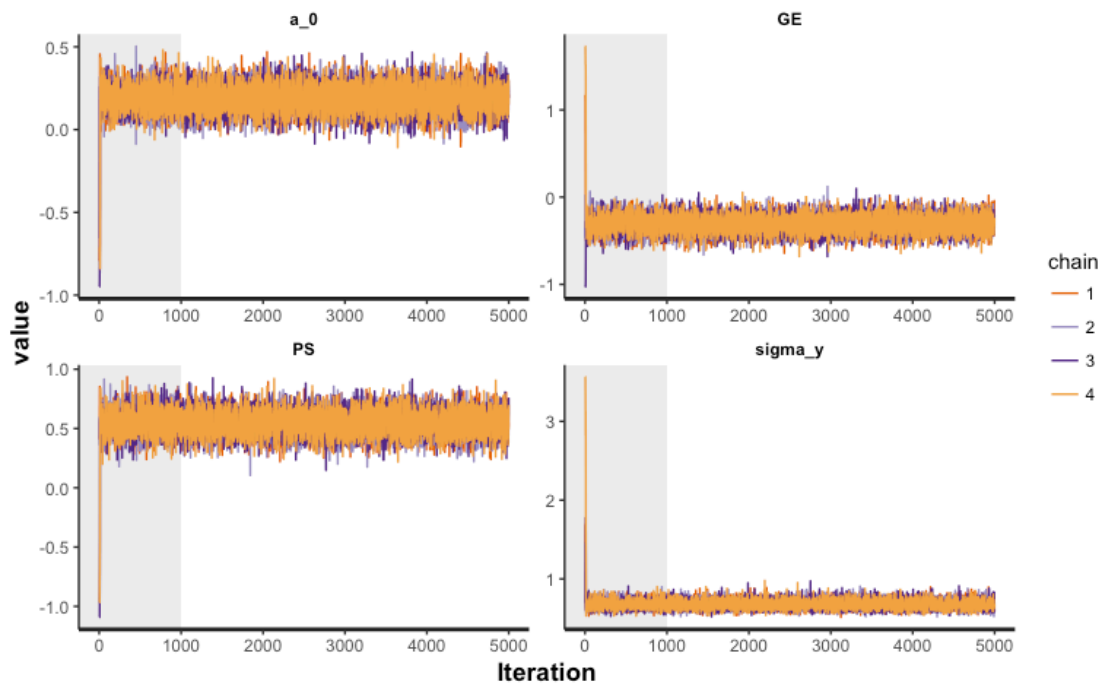

## Conformity 2

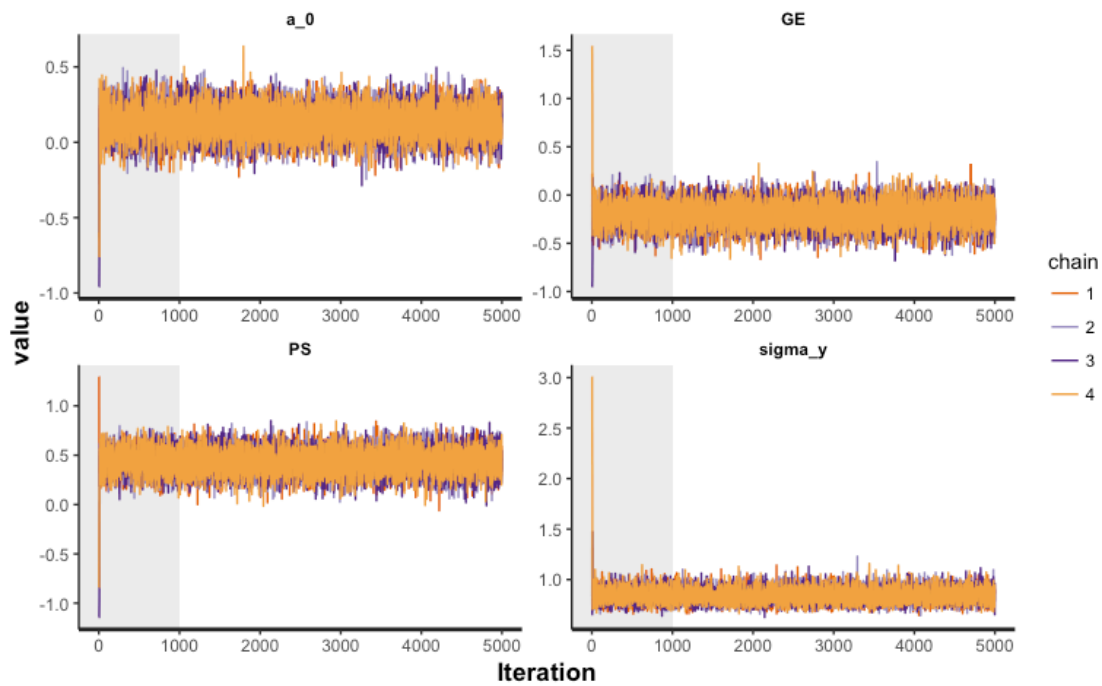

### Conformity 3

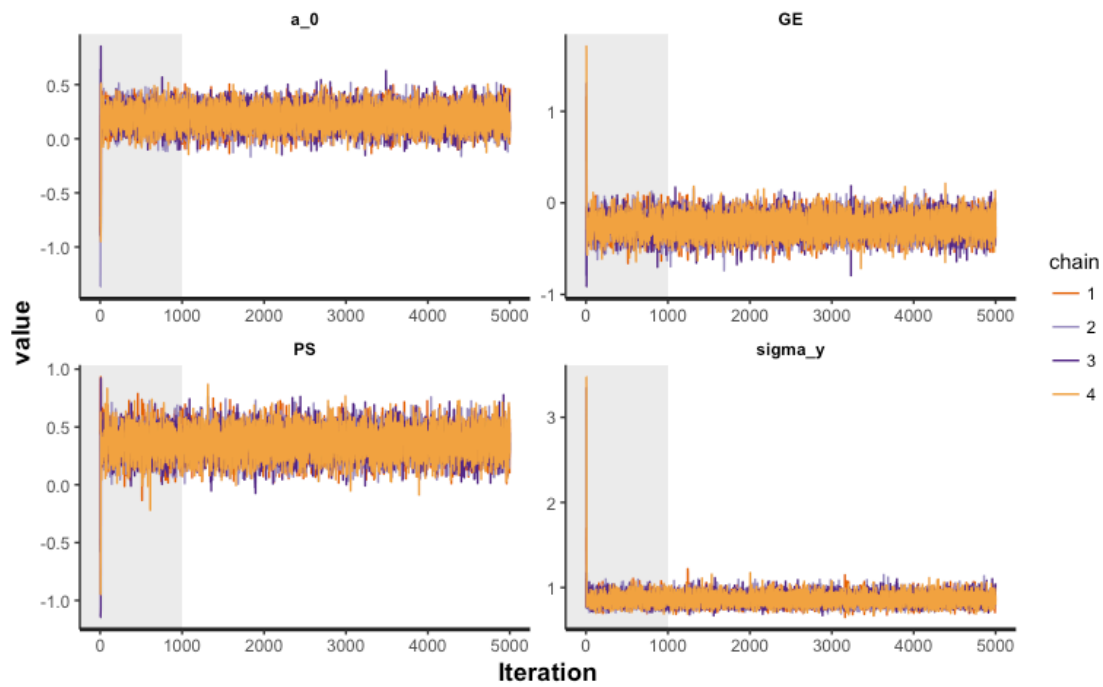

### Conformity 4

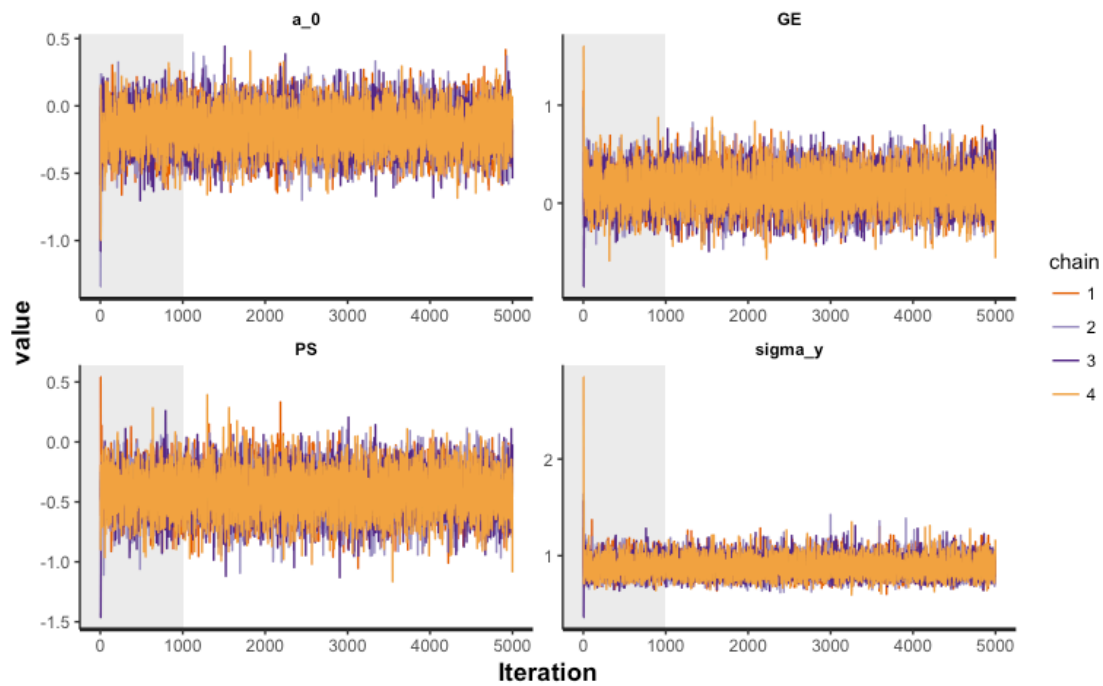

## Model 2

Labels in the top of each graph represent types of parameter:  $\mu_a = \mu_a$ ,  $GE = GE$ ,  $PS = PS$ ,  $a[j] = a_j$ ,  $\sigma_a = \sigma_a$ ,  $\sigma_y = \sigma_y$ . Subscript numbers under  $a$  represent global regions (1: Sub-Saharan Africa, 2 East Asia and Pacific, 3: Europe and Central Asia, 4: Latin America and Caribbean, 5: Middle East and North Africa, and 6: South Asia).

### Individualism

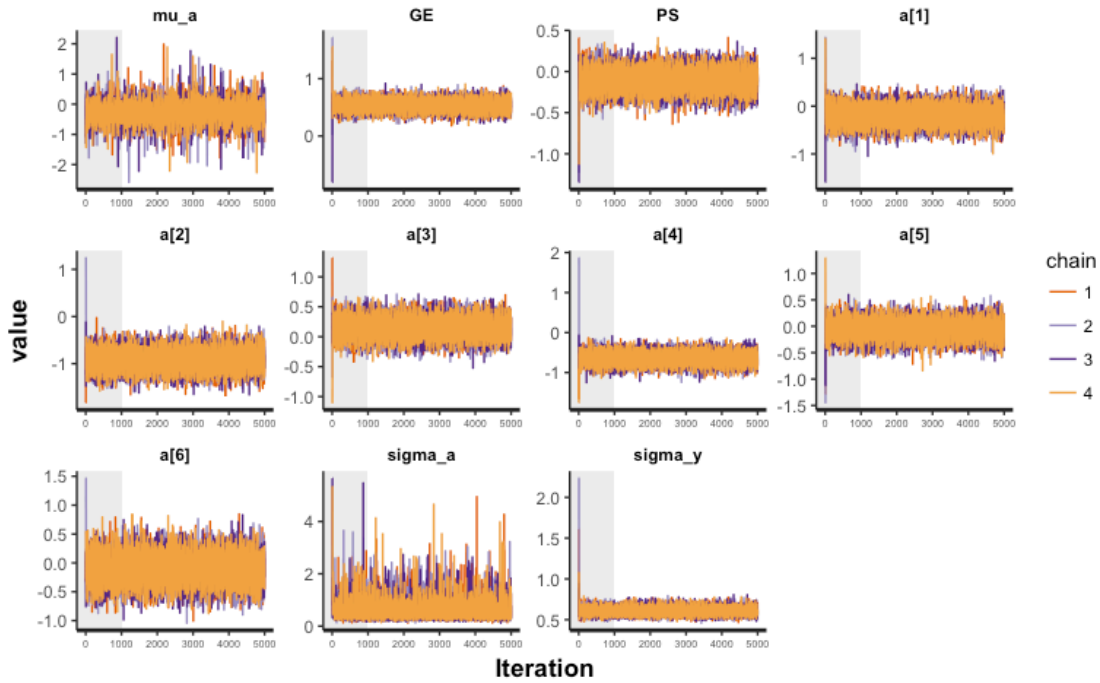

## Conformity 1

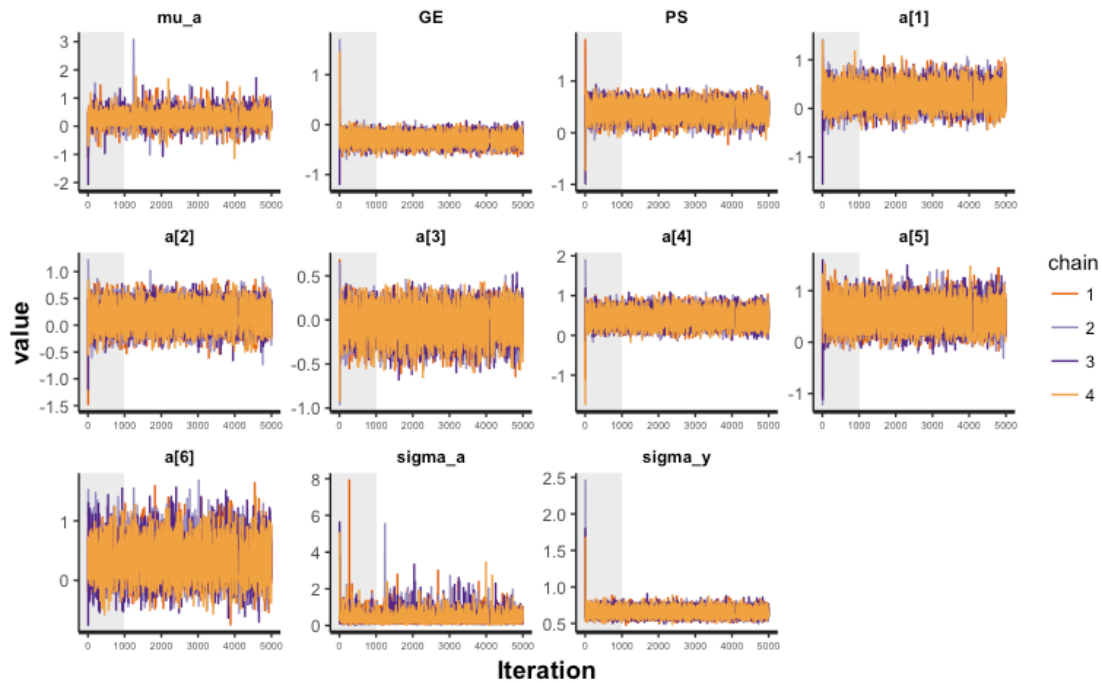

## Conformity 2

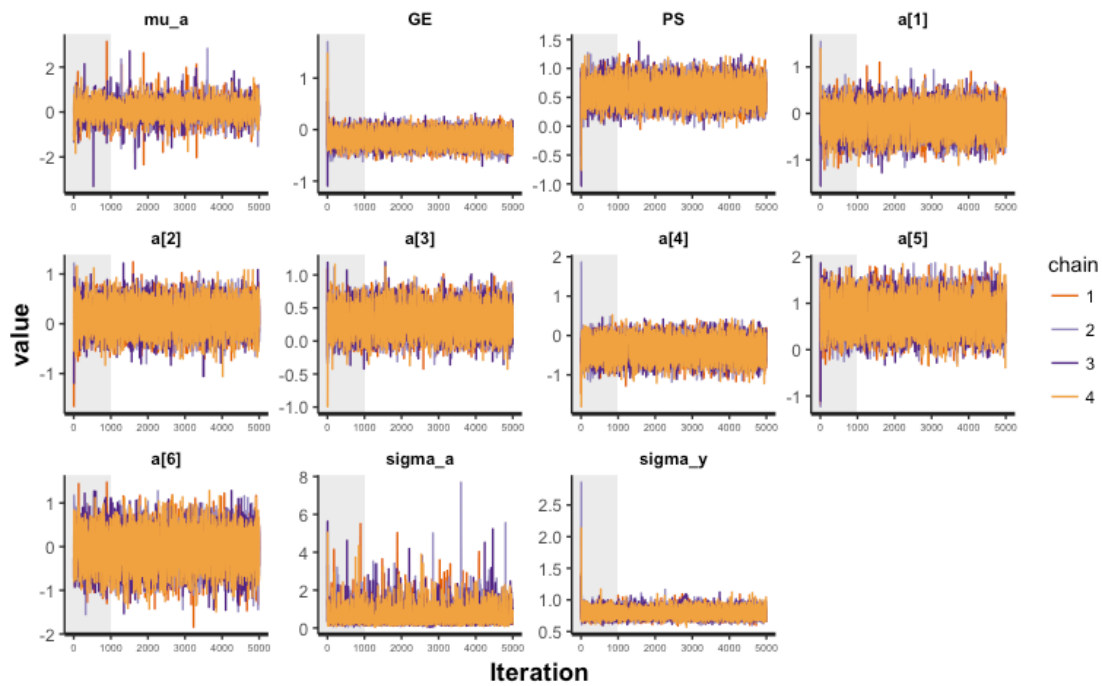

## Conformity 3

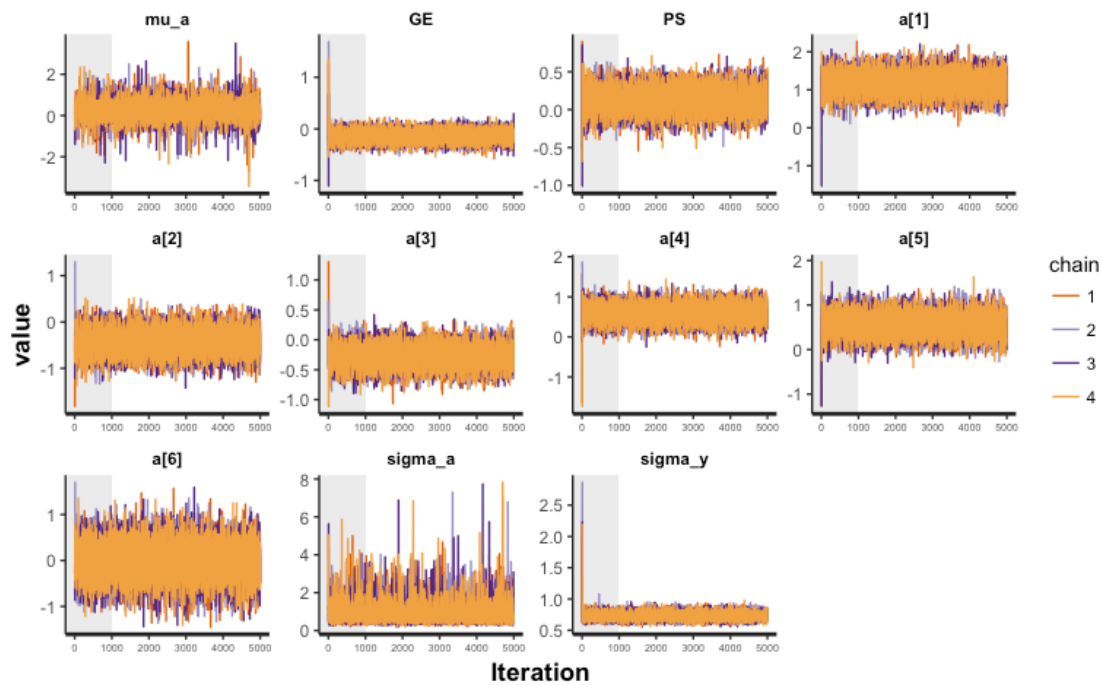

## Conformity 4

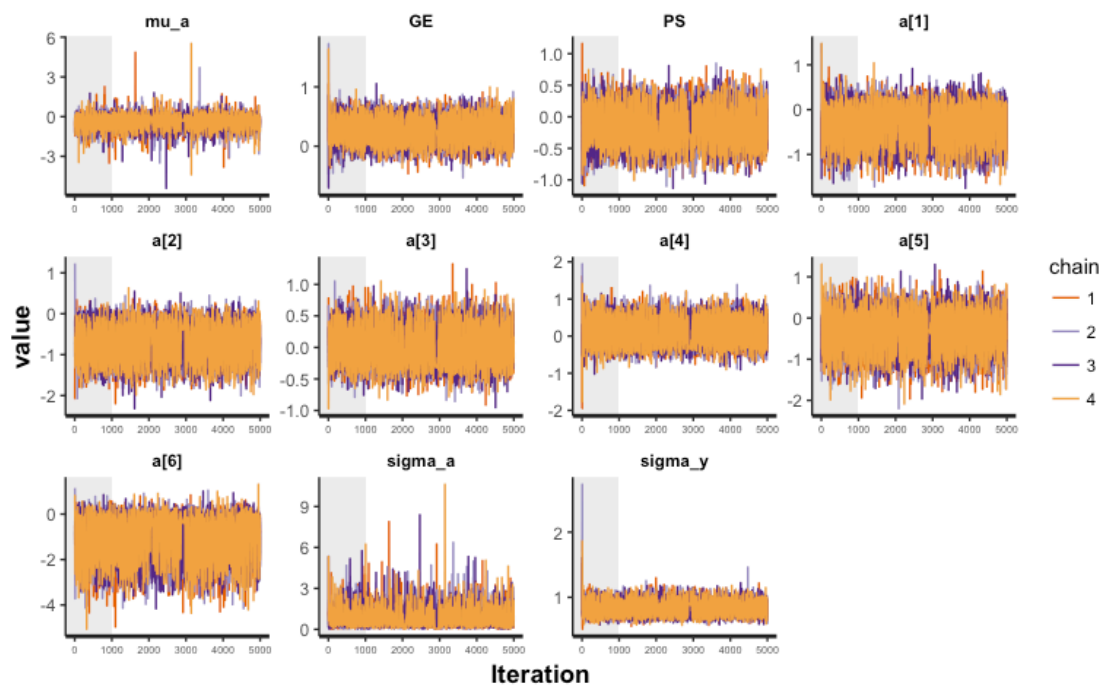

## Model 3

Labels in the top of each graph represent types of parameter:  $\mu_a = \mu_a$ ,  $\mu_{GE} = \mu_{GE}$ ,  $\mu_{PS} = \mu_{PS}$ ,  $a[j] = a_j$ ,  $GE[j] = GE_j$ ,  $PS[j] = PS_j$ ,  $\sigma_a = \sigma_a$ ,  $\sigma_{GE} = \sigma_{GE}$ ,  $\sigma_{PS} = \sigma_{PS}$ , and  $\sigma_y = \sigma_y$ . Subscript numbers under  $a$ ,  $GE$ , and  $PS$  represent global regions (1: Sub-Saharan Africa, 2 East Asia and Pacific, 3: Europe and Central Asia, 4: Latin America and Caribbean, 5: Middle East and North Africa, and 6: South Asia).

## Individualism

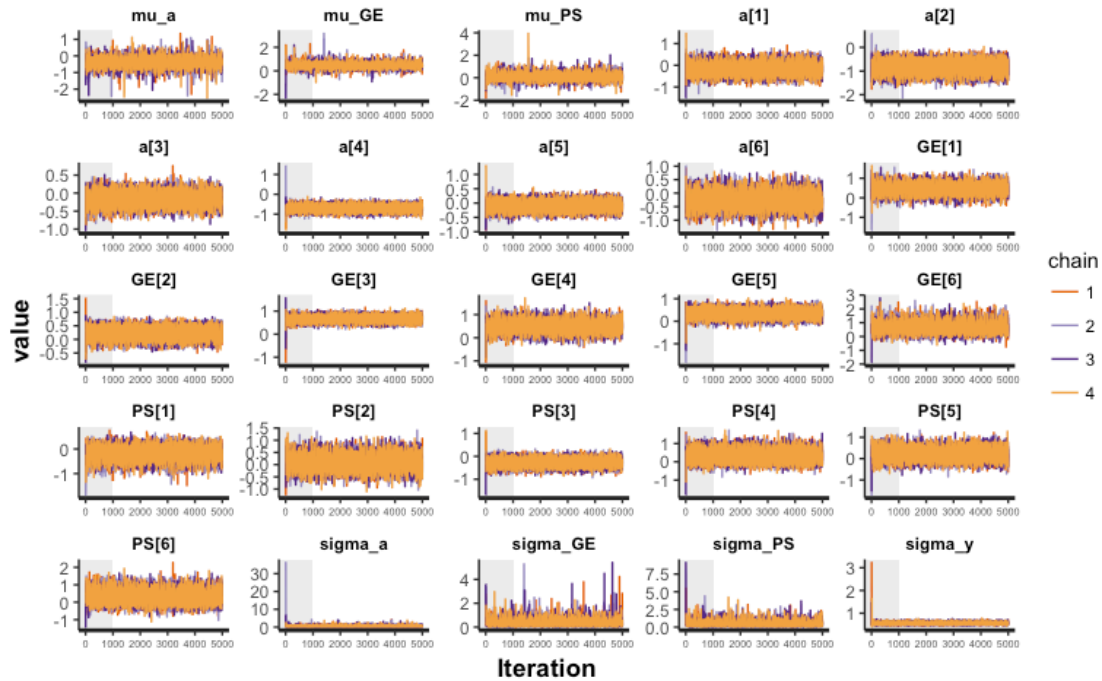

## Conformity 1

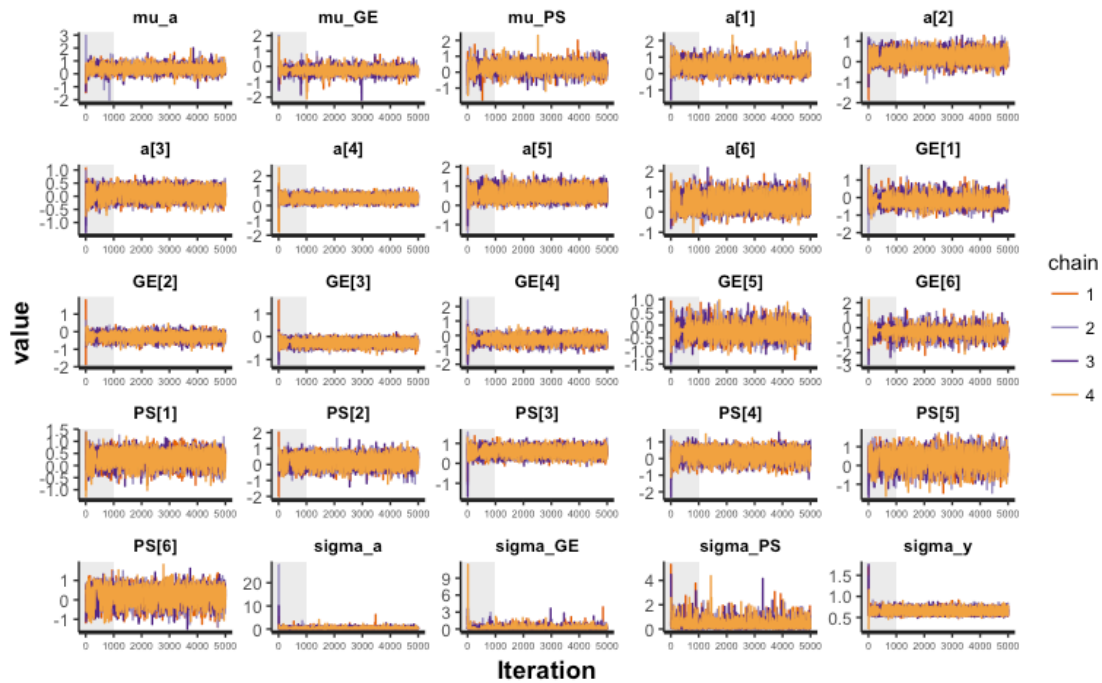

## Conformity 2

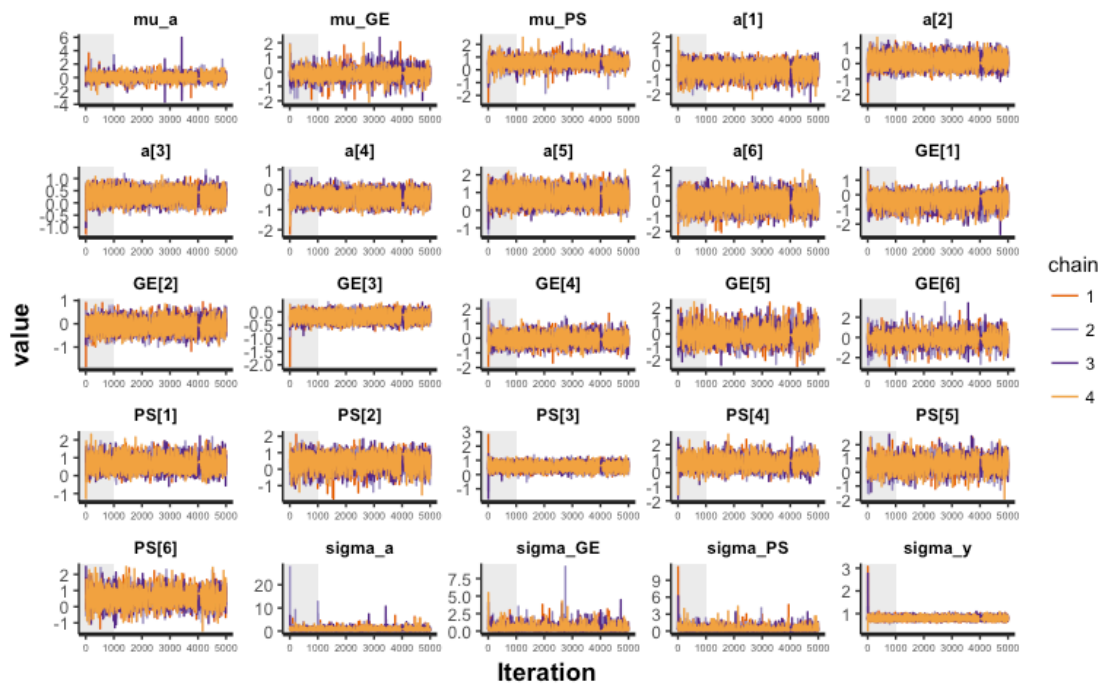



### Conformity 3

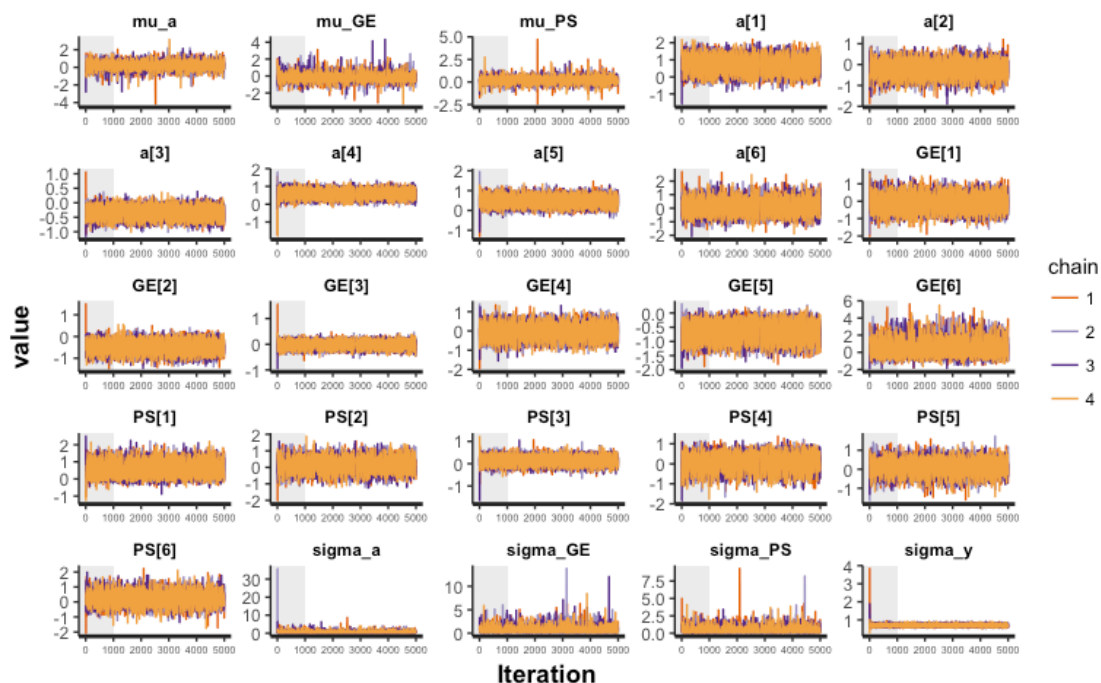

### Conformity 4

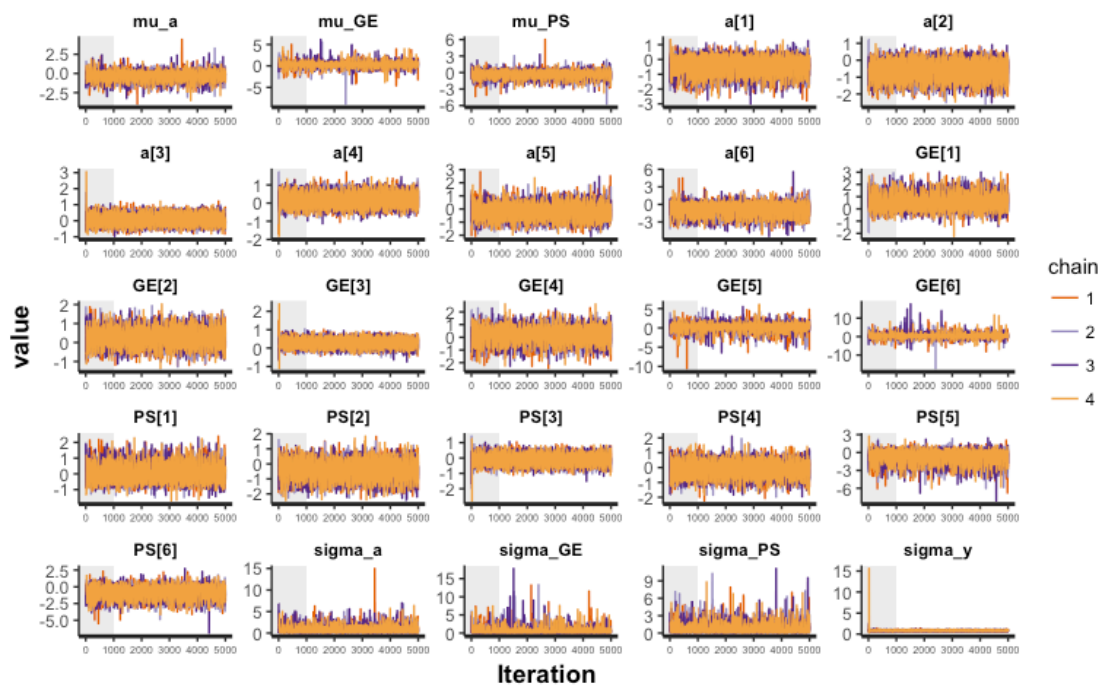

## Results of each model when GDP per capita was used as an independent variable

### Model 1

Labels in the top of each graph represent types of parameter:  $a_0 = a_0$ ,  $GDP = GDP$ ,  $PS = PS$ ,  $\sigma_y = \sigma_y$ .

#### Individualism

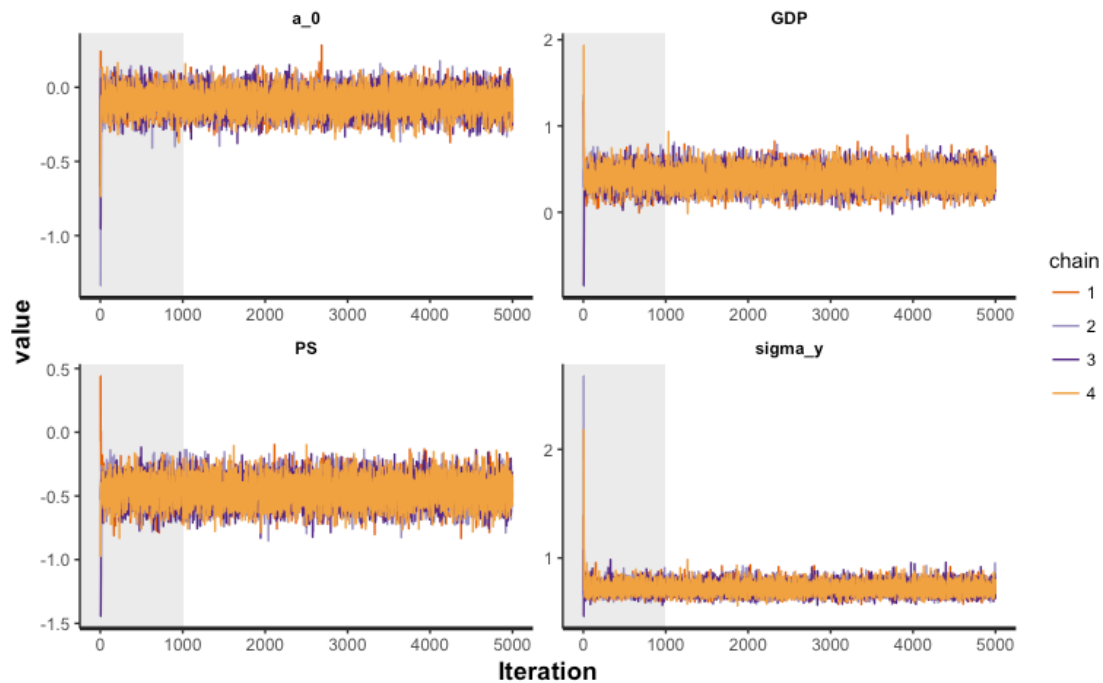

## Conformity 1

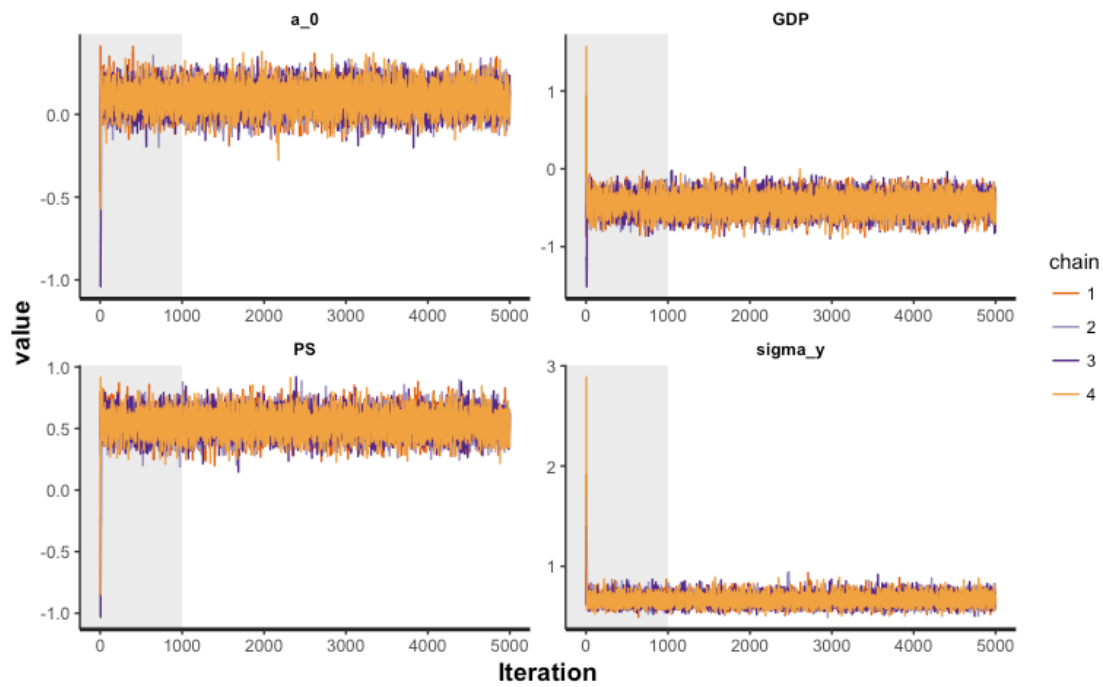

## Conformity 2

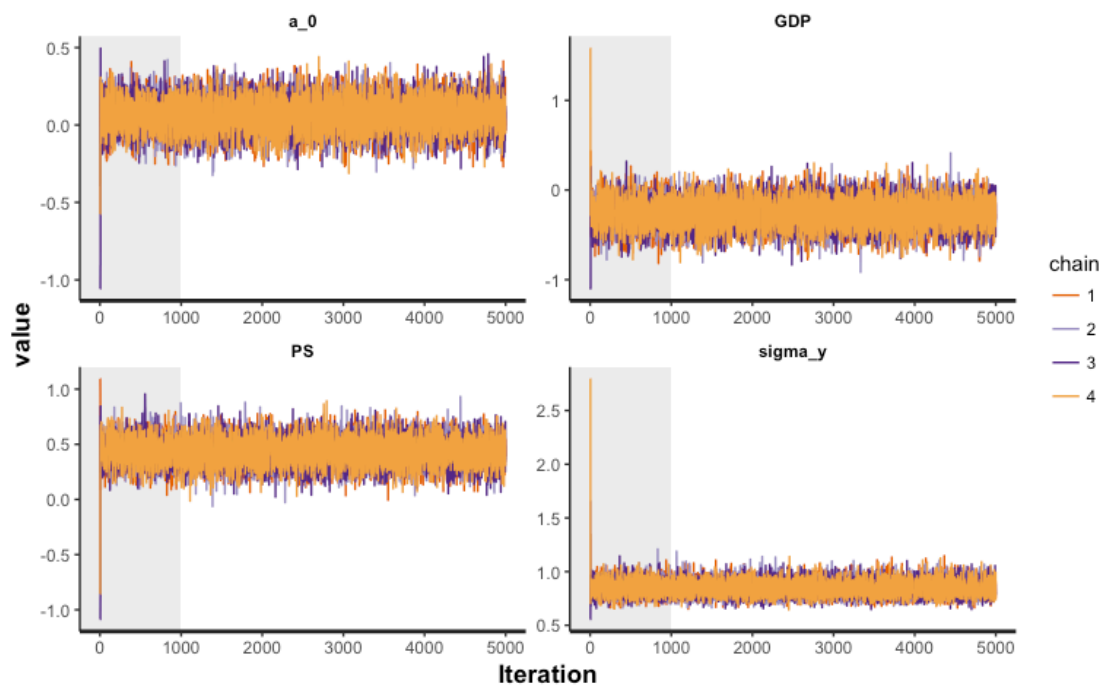

## Conformity 3

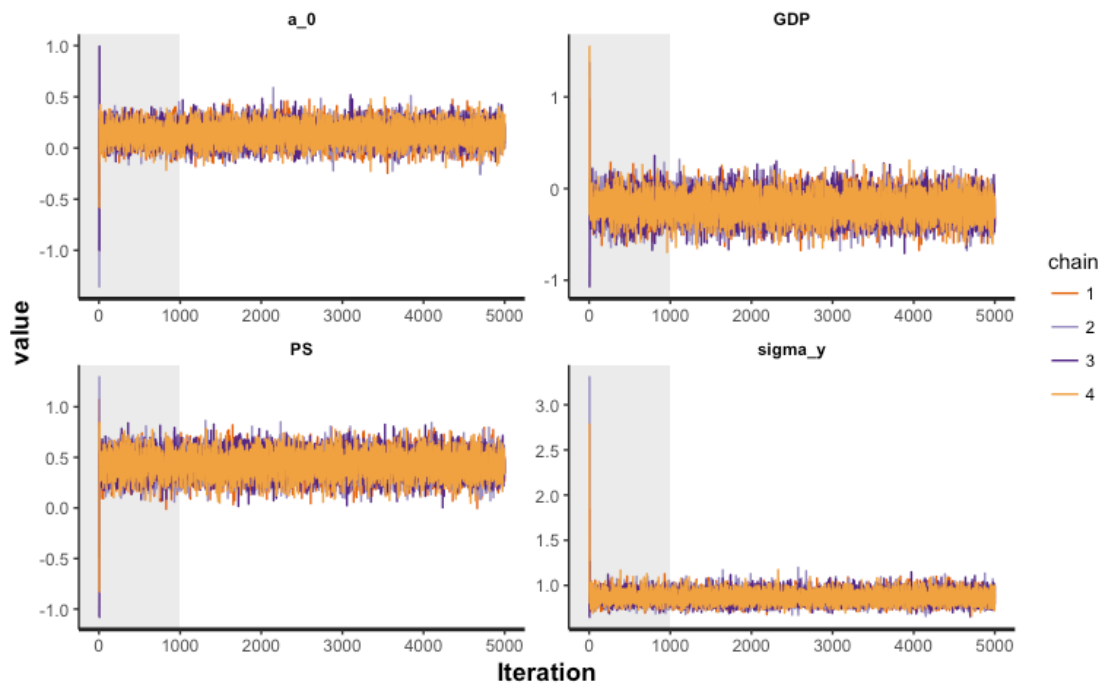

## Conformity 4

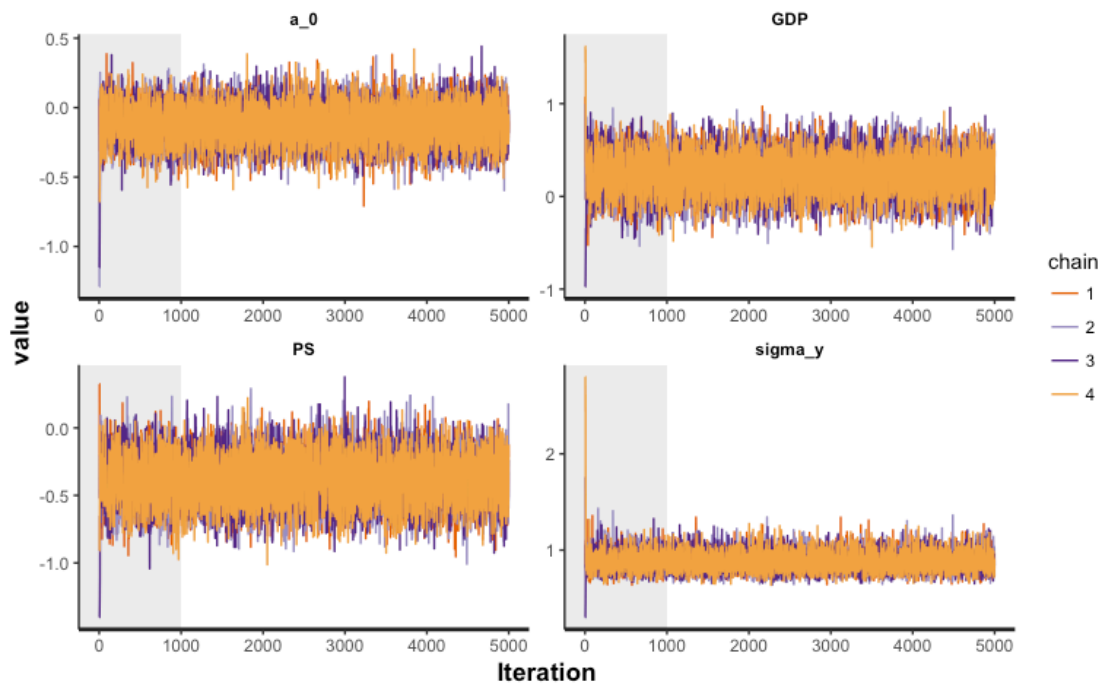

## Model 2

Labels in the top of each graph represent types of parameter:  $\mu_a = \mu_a$ ,  $GDP = GDP$ ,  $PS = PS$ ,  $a[j] = a_j$ ,  $\sigma_a = \sigma_a$ ,  $\sigma_y = \sigma_y$ . Subscript numbers under  $a$  represent global regions (1: Sub-Saharan Africa, 2 East Asia and Pacific, 3: Europe and Central Asia, 4: Latin America and Caribbean, 5: Middle East and North Africa, and 6: South Asia).

### Individualism

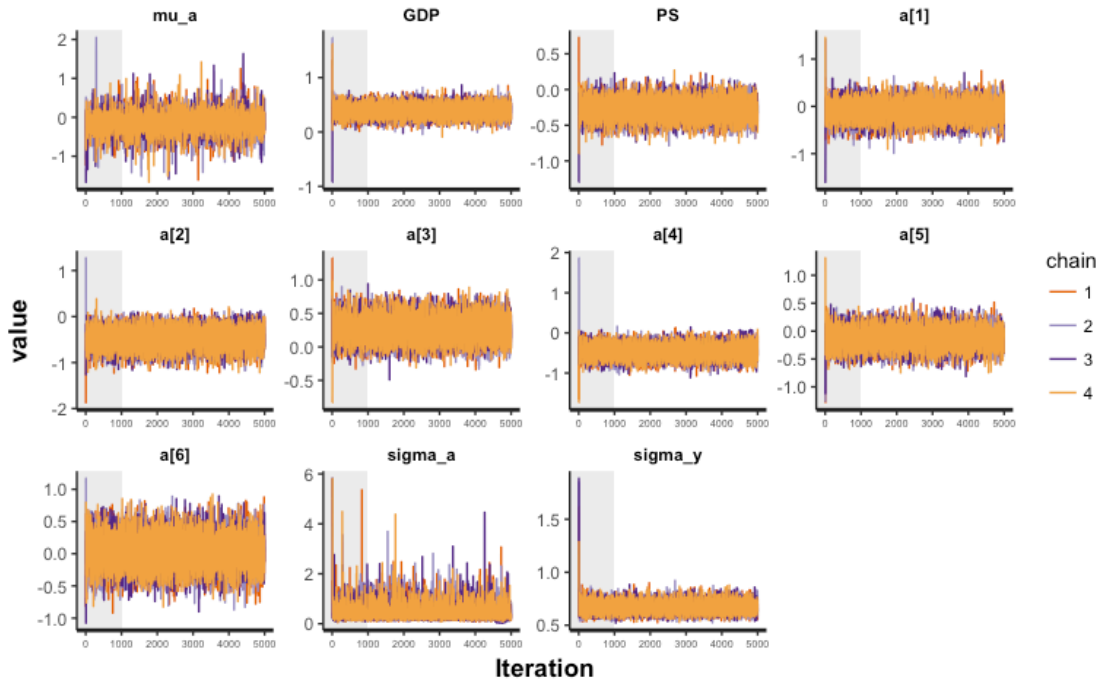

## Conformity 1

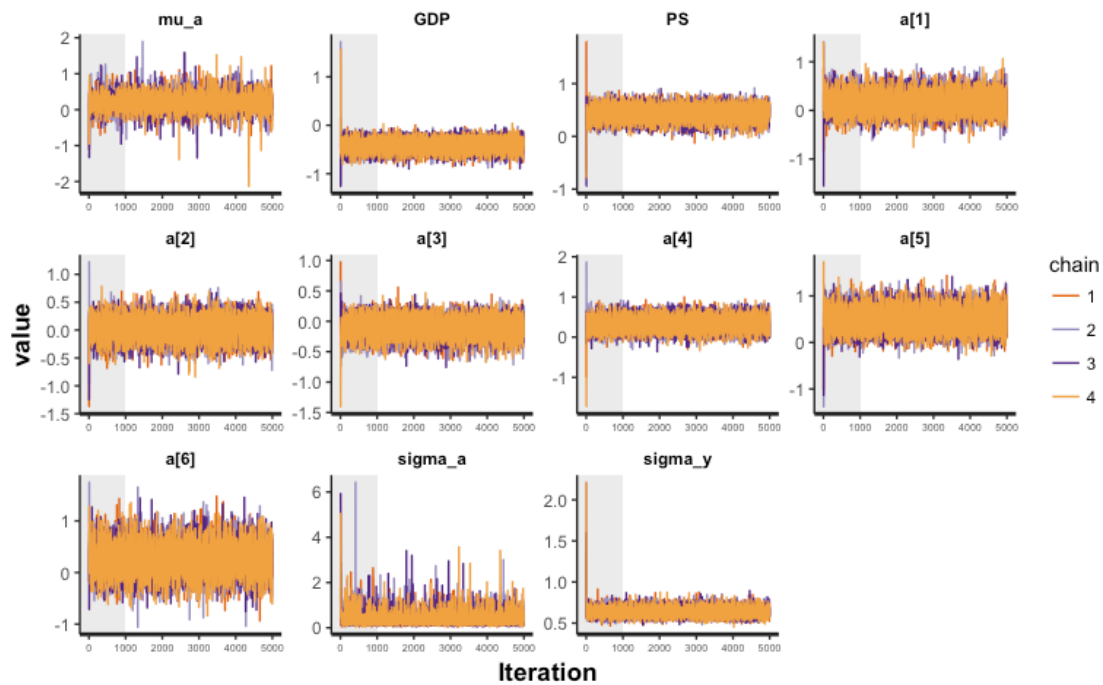

## Conformity 2

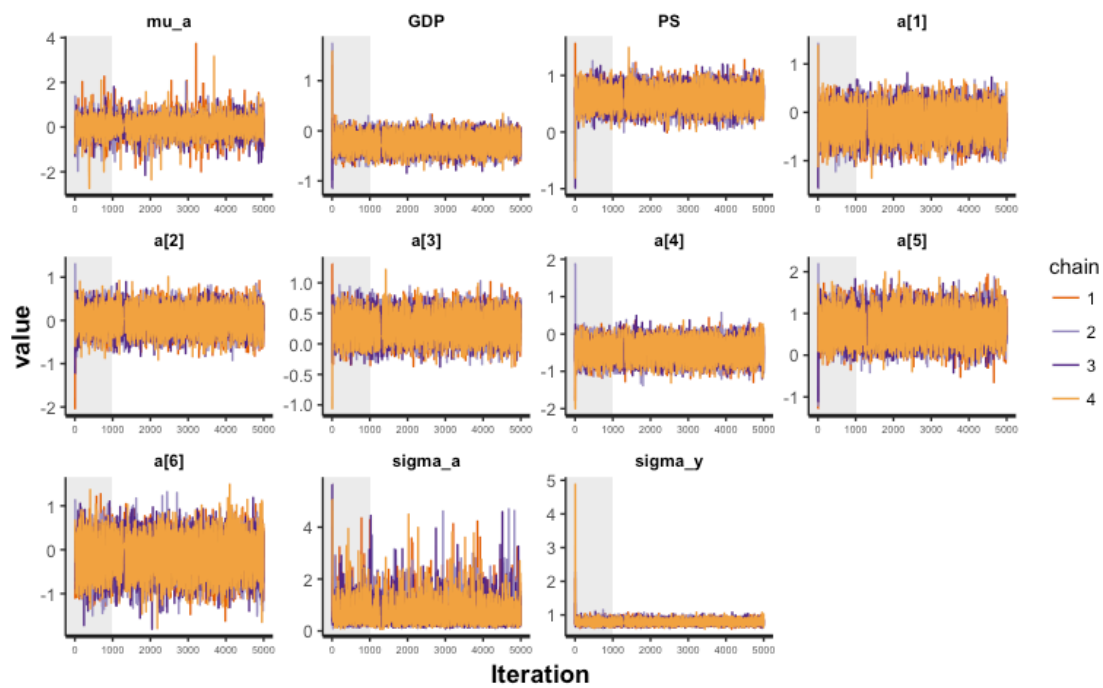

## Conformity 3

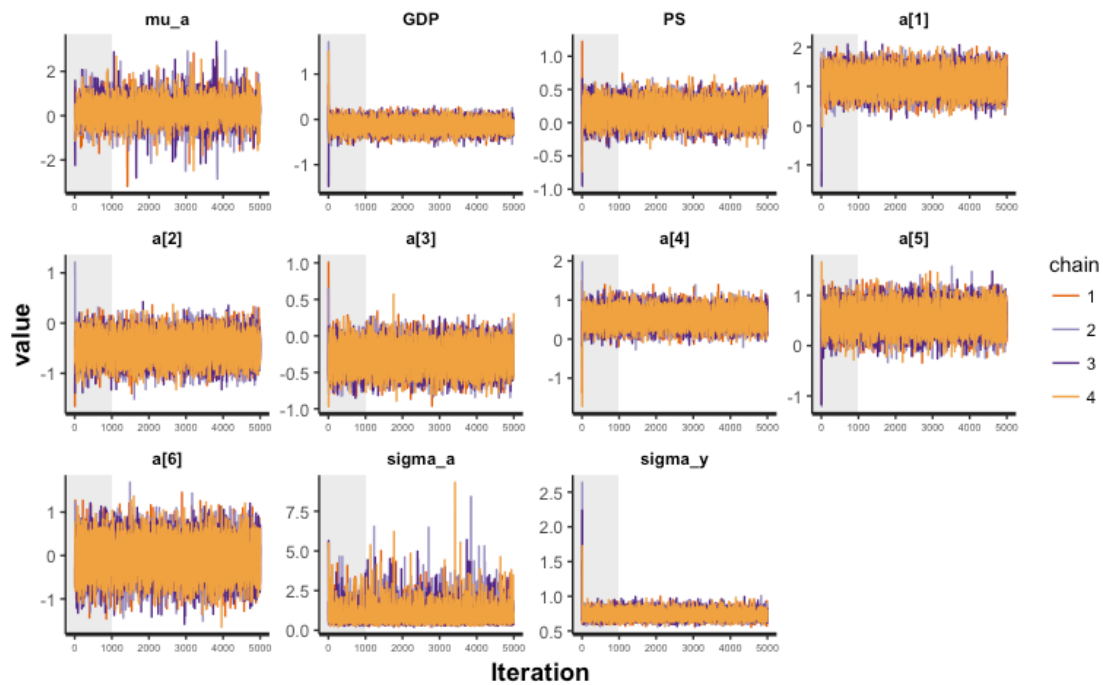

## Conformity 4

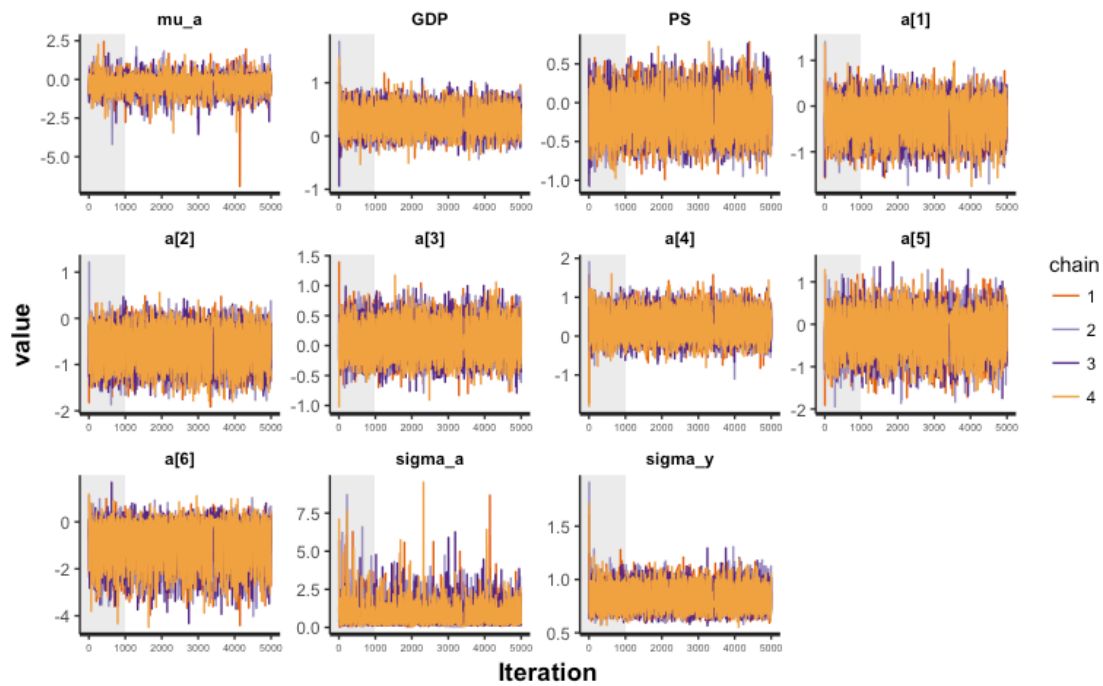

## Model 3

Labels in the top of each graph represent types of parameter:  $\mu_a = \mu_a$ ,  $\mu_{GDP} = \mu_{GDP}$ ,  $\mu_{PS} = \mu_{PS}$ ,  $a[j] = a_j$ ,  $GDP[j] = GDP_j$ ,  $PS[j] = PS_j$ ,  $\sigma_a = \sigma_a$ ,  $\sigma_{GDP} = \sigma_{GDP}$ ,  $\sigma_{PS} = \sigma_{PS}$ , and  $\sigma_y = \sigma_y$ . Subscript numbers under  $a$ ,  $GDP$ , and  $PS$  represent global regions (1: Sub-Saharan Africa, 2 East Asia and Pacific, 3: Europe and Central Asia, 4: Latin America and Caribbean, 5: Middle East and North Africa, and 6: South Asia).

## Individualism

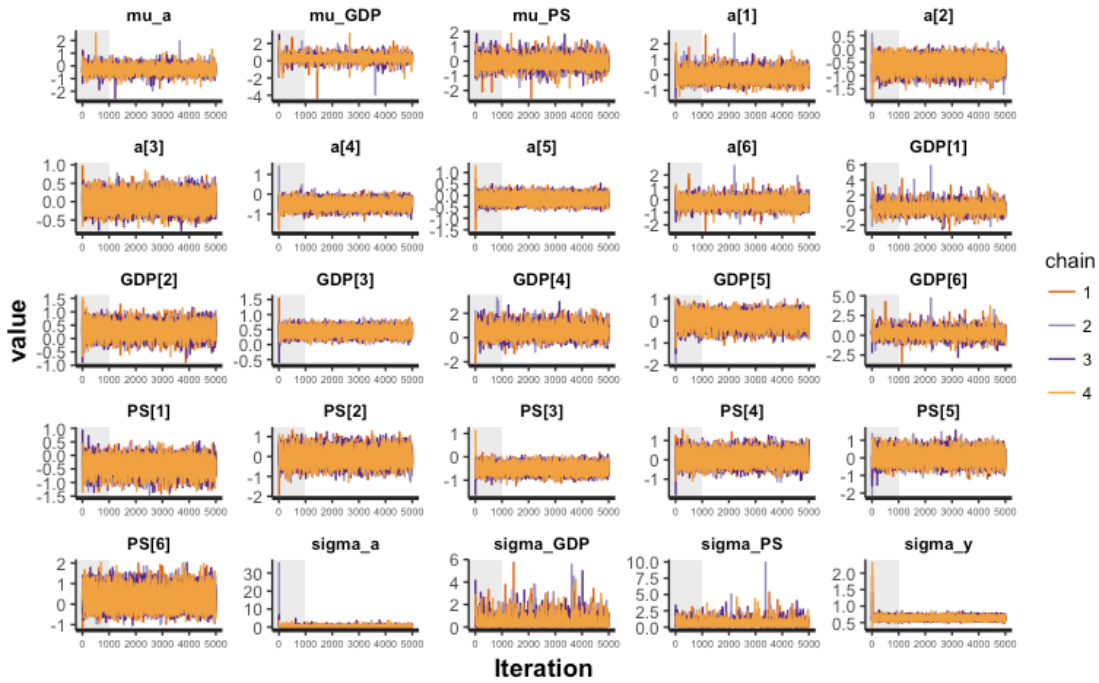



## Conformity 1

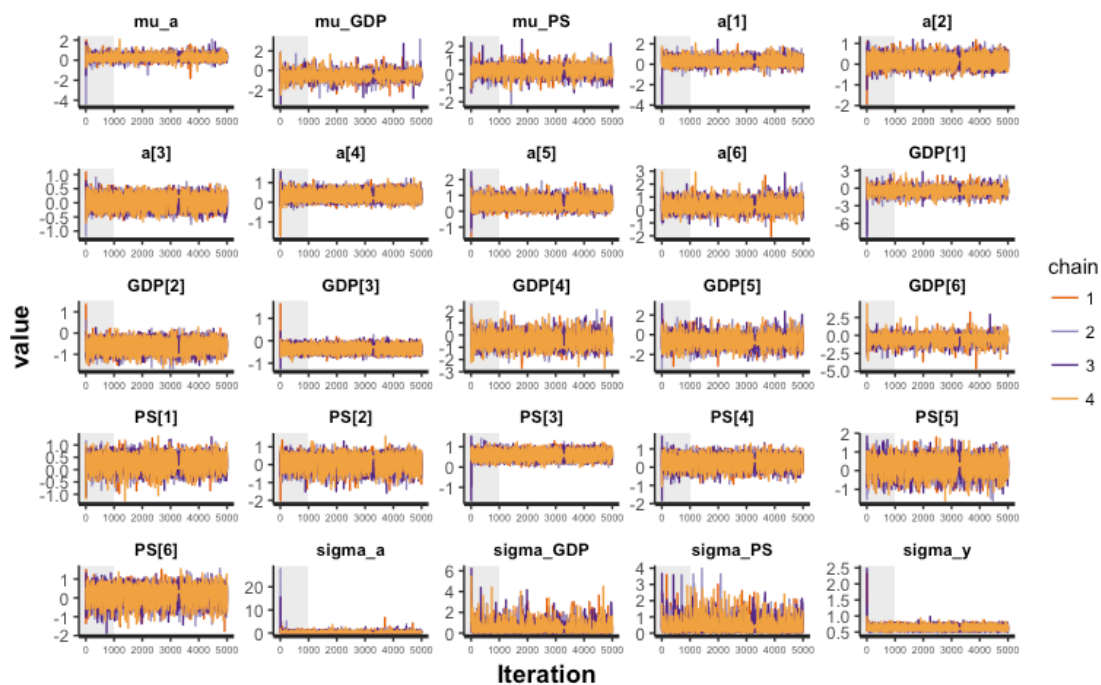

## Conformity 2

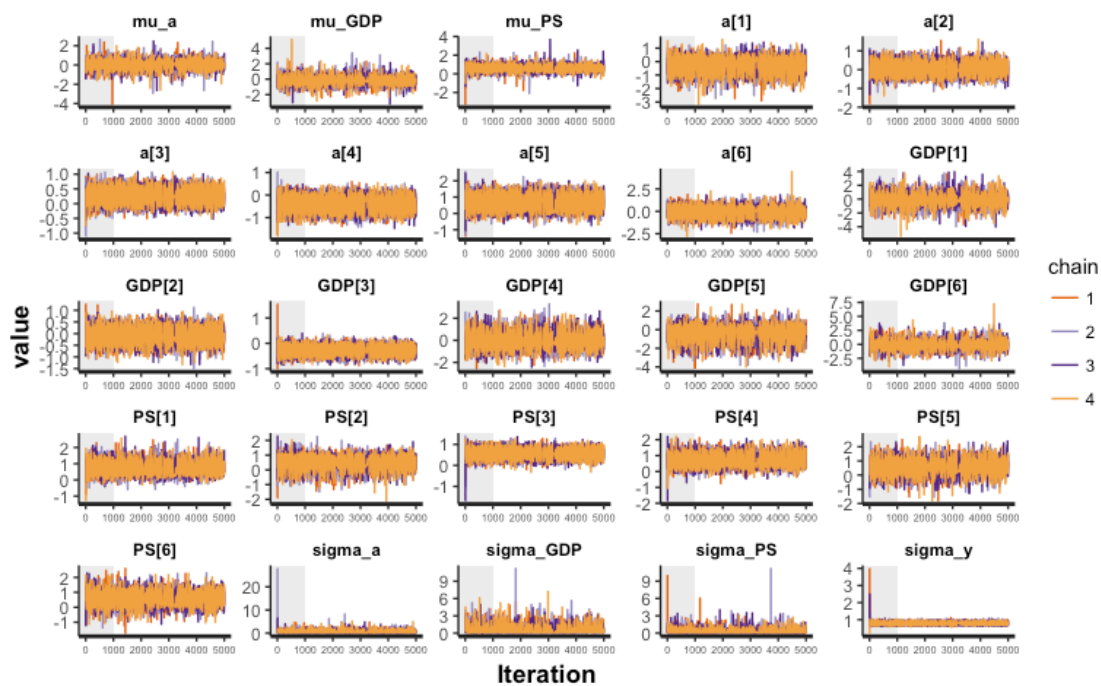

### Conformity 3

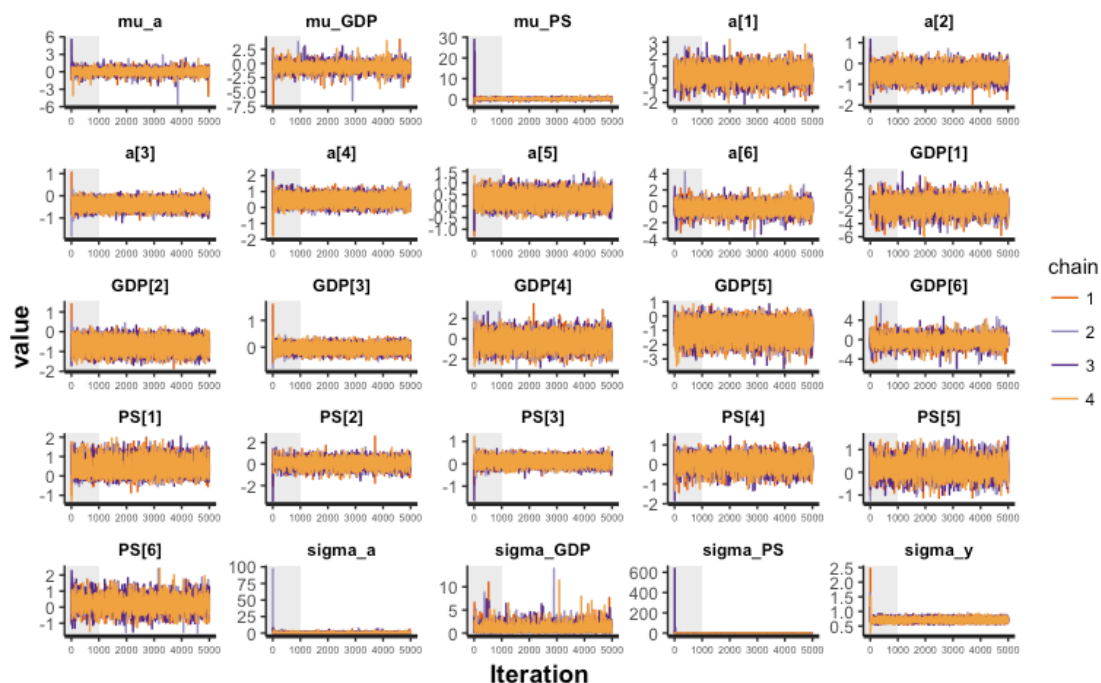

### Conformity 4

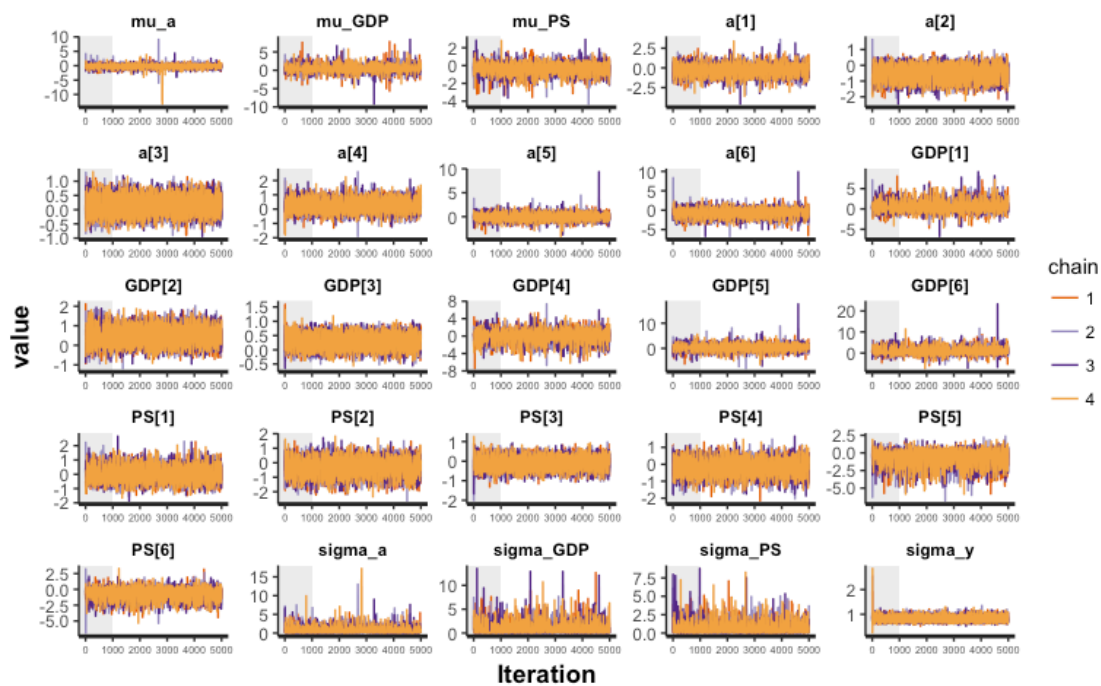

Supplement: Supplementary file [file 13248107]
